# Supplementary material
Source: ML conference proceedings conference paper supplement (https://proceedings.neurips.cc/paper_files/paper/2014/hash/f4a4da9aa7eadfd23c7bdb7cf57b3112-Abstract.html)
Supplement: Supplementary file [file f4a4da9aa7eadfd23c7bdb7cf57b3112-Supplemental.zip]

---

# Online Decision-Making in General Combinatorial Spaces

---

## A Supplement to Section 2 (Preliminaries and Background)

### A.1 Online Mirror Descent (OMD) for Online Linear Optimization

---

**Algorithm** Online Mirror Descent (OMD) for Online Linear Optimization

---

**Inputs:**

Convex set  $\Omega \subseteq \mathbb{R}^n$

**Parameters:**

$\eta > 0$

Closed convex set  $\mathcal{K} \supseteq \Omega$ , Legendre function  $F : \mathcal{K} \rightarrow \mathbb{R}$

**Initialize:**

$x^1 \in \operatorname{argmin}_{x \in \Omega} F(x)$  (or  $x^1 =$  any other point in  $\Omega$ )

**For**  $t = 1 \dots T$ :

– Receive loss vector  $\ell^t \in \mathbb{R}^n$

– Incur loss  $x^t \cdot \ell^t$

– Update:

$\tilde{x}^{t+1} \leftarrow \nabla F^*(\nabla F(x^t) - \eta \ell^t)$

$x^{t+1} \leftarrow \operatorname{argmin}_{x \in \Omega} B_F(x, \tilde{x}^{t+1})$

---

The following bound on the regret of OMD (in the linear setting) is well known (e.g. see [7]):

**Theorem 4** (Regret bound for OMD). *Let  $B_F(x, x^1) \leq D^2 \forall x \in \Omega$ . Let  $\|\cdot\|$  be any norm in  $\mathbb{R}^n$  such that  $\|\ell^t\| \leq G \forall t \in [T]$ , and such that the restriction of  $F$  to  $\Omega$  is  $\alpha$ -strongly convex w.r.t.  $\|\cdot\|_*$ , the dual norm of  $\|\cdot\|$ . Then setting  $\eta^* = \frac{D}{G} \sqrt{\frac{2\alpha}{T}}$  gives*

$$R_T[\text{OMD}(\eta^*)] \left( = \sum_{t=1}^T x^t \cdot \ell^t - \inf_{x \in \Omega} \sum_{t=1}^T x \cdot \ell^t \right) \leq DG \sqrt{\frac{2T}{\alpha}}.$$

### A.2 Hedge/Naïve OMD for Online Combinatorial Decision-Making

---

**Algorithm** Hedge/Naïve OMD for Online Combinatorial Decision-Making [10]

---

**Inputs:**

Finite set of combinatorial structures  $\mathcal{C}$

Mapping  $\phi : \mathcal{C} \rightarrow \mathbb{R}^d$

**Parameters:**

$\eta > 0$

**Initialize:**

$p^1 = (\frac{1}{|\mathcal{C}|}, \dots, \frac{1}{|\mathcal{C}|}) \in \Delta_{\mathcal{C}}$

**For**  $t = 1 \dots T$ :

– Randomly draw  $c^t \sim p^t$

– Receive loss vector  $\ell^t \in [0, 1]^d$

– Incur loss  $\phi(c^t) \cdot \ell^t$

– Update:

$$\forall c \in \mathcal{C} : p_c^{t+1} \leftarrow \frac{p_c^t \exp(-\eta \phi(c) \cdot \ell^t)}{Z^t},$$

$$\text{where } Z^t = \sum_{c' \in \mathcal{C}} p_{c'}^t \exp(-\eta \phi(c') \cdot \ell^t)$$


---

### A.3 Follow the Perturbed Leader (FPL) for Online Combinatorial Decision-Making

---

**Algorithm** Follow the Perturbed Leader (FPL) for Online Combinatorial Decision-Making [13]

---

**Inputs:**

Finite set of combinatorial structures  $\mathcal{C}$   
Mapping  $\phi : \mathcal{C} \rightarrow \mathbb{R}^d$

**Parameters:**

$\eta > 0$

**For**  $t = 1 \dots T$ :

- Draw  $z^t \in [0, \frac{1}{\eta}]^d$  uniformly at random
  - Predict  $c^t \in \operatorname{argmin}_{c \in \mathcal{C}} \phi(c) \cdot (\sum_{s=1}^{t-1} \ell^s + z^t)$
  - Receive loss vector  $\ell^t \in [0, 1]^d$
  - Incur loss  $\phi(c^t) \cdot \ell^t$
- 

### B Supplement to Section 7 (Transportation Polytopes)

The decomposition step in applying LDOMD to transportation polytopes requires finding a suitable extreme point on each iteration. Here we give details of how one can find such an extreme point.

We start by giving a procedure which, given a matrix  $X \in \mathcal{T}(a, b)$ , efficiently finds an extreme point  $Q \in \mathcal{T}(a, b)$  such that  $X_{ij} = 0 \implies Q_{ij} = 0$  (note that such an extreme point always exists, since  $X$  can be written as a convex combination of extreme points, all of which must necessarily have a zero entry wherever  $X$  does). We will make use of the following characterization of extreme points of transportation polytopes in terms of spanning forests of complete bipartite graphs (e.g. see [6]):

**Theorem 5** (Characterization of extreme points of transportation polytopes). *Let  $a \in \mathbb{Z}_+^m$ ,  $b \in \mathbb{Z}_+^n$ . A matrix  $X \in \mathcal{T}(a, b)$  is an extreme point of  $\mathcal{T}(a, b)$  if and only if the edges  $\{(i, j) : X_{ij} > 0\}$  form a spanning forest of the complete bipartite graph  $K_{m,n}$ .*

The basic idea behind the procedure below is as follows: given  $X \in \mathcal{T}(a, b)$ , let  $E = \{(i, j) : X_{ij} > 0\}$ . If  $E$  forms a spanning forest of  $K_{m,n}$ , then by Lemma 5,  $X$  is already an extreme point. Otherwise, successively remove cycles from  $E$  and adjust corresponding entries in  $X$  so that  $X$  remains in  $\mathcal{T}(a, b)$  while satisfying  $X_{ij} > 0 \iff (i, j) \in E$ . Eventually,  $E$  must be a spanning forest of  $K_{m,n}$ , and therefore by Lemma 5,  $X$  must be an extreme point of  $\mathcal{T}(a, b)$ .

---

**Algorithm** Procedure for finding an extreme point  $Q$  of  $\mathcal{T}(a, b)$  such that

$X_{ij} = 0 \implies Q_{ij} = 0$  for a given matrix  $X \in \mathcal{T}(a, b)$

---

**Input:**

$X \in \mathcal{T}(a, b)$  (where  $a \in \mathbb{Z}_+^m$ ,  $b \in \mathbb{Z}_+^n$ )

**Initialize:**

$E \leftarrow \{(i, j) : X_{ij} > 0\}$

**While** ( $E$  does not form a spanning forest of  $K_{m,n}$ ) **do:**

- Find a cycle  $E' = \{(i_1, j_1), (i_2, j_1), (i_2, j_2), \dots, (i_s, j_s), (i_{s+1} = i_1, j_s)\} \subseteq E$  for some  $s \geq 2$
- Let  $e_{\min} \in \operatorname{argmin}_{e \in E'} X_e$
- $\theta \leftarrow \begin{cases} +1 & \text{if } e_{\min} = (i_r, j_r) \text{ for some } r \in [s] \\ -1 & \text{if } e_{\min} = (i_{r+1}, j_r) \text{ for some } r \in [s] \end{cases}$
- **For**  $r = 1 \dots s$  **do:**
  - $X_{i_r, j_r} \leftarrow X_{i_r, j_r} - \theta X_{e_{\min}}$
  - $X_{i_{r+1}, j_r} \leftarrow X_{i_{r+1}, j_r} + \theta X_{e_{\min}}$
- $E \leftarrow \{(i, j) : X_{ij} > 0\}$

**end while**

$Q \leftarrow X$

**Output:**  $Q$

---

**Applying the above procedure to implement decomposition step.** The above procedure can be used to implement the decomposition step for transportation polytopes in Section 7 by doing the following on each iteration  $k$ :

- Apply the above procedure to the matrix  $A^k$ , which can be verified to belong to  $\mathcal{T}(\gamma_k a, \gamma_k b)$  for suitable  $\gamma_k \in \mathbb{R}_+$  (specifically,  $\gamma_k = 1 - \sum_{r=1}^{k-1} \alpha_r$ ), to get an extreme point  $\tilde{Q}^k \in \mathcal{T}(\gamma_k a, \gamma_k b)$  satisfying  $A_{ij}^k = 0 \implies \tilde{Q}_{ij}^k = 0$ .
- Set  $Q^k \leftarrow \frac{1}{\gamma_k} \tilde{Q}^k$ .

It can be verified that  $Q^k$  is then an extreme point of  $\mathcal{T}(a, b)$  and satisfies  $A_{ij}^k = 0 \implies Q_{ij}^k = 0$  as desired.
